# Supplementary material for: High-fat diet impact on intestinal cholesterol conversion by the microbiota and serum cholesterol levels
Source: PubMed Central journal article supplement (PMC10485154; doi:10.1016/j.isci.2023.107697), 2023-08-21
Supplement: mmc1.pdf [file mmc1.pdf]

## **Supplemental information**

### **High-fat diet impact on intestinal cholesterol**

### **conversion by the microbiota**

### **and serum cholesterol levels**

**Alena M. Bubeck, Paul Urbain, Cathrine Horn, Anna S. Jung, Lisa Ferrari, Hannah K. Ruple, Daniel Podlesny, Stefanie Zorn, Johnny Laupsa-Borge, Caroline Jensen, Inge Lindseth, Gülen Arslan Lied, Jutta Dierkes, Gunnar Mellgren, Hartmut Bertz, Silke Matysik, Sabrina Krauthauer, Gerhard Liebisch, Hans-Frieder Schoett, Simon N. Dankel, and W. Florian Fricke**

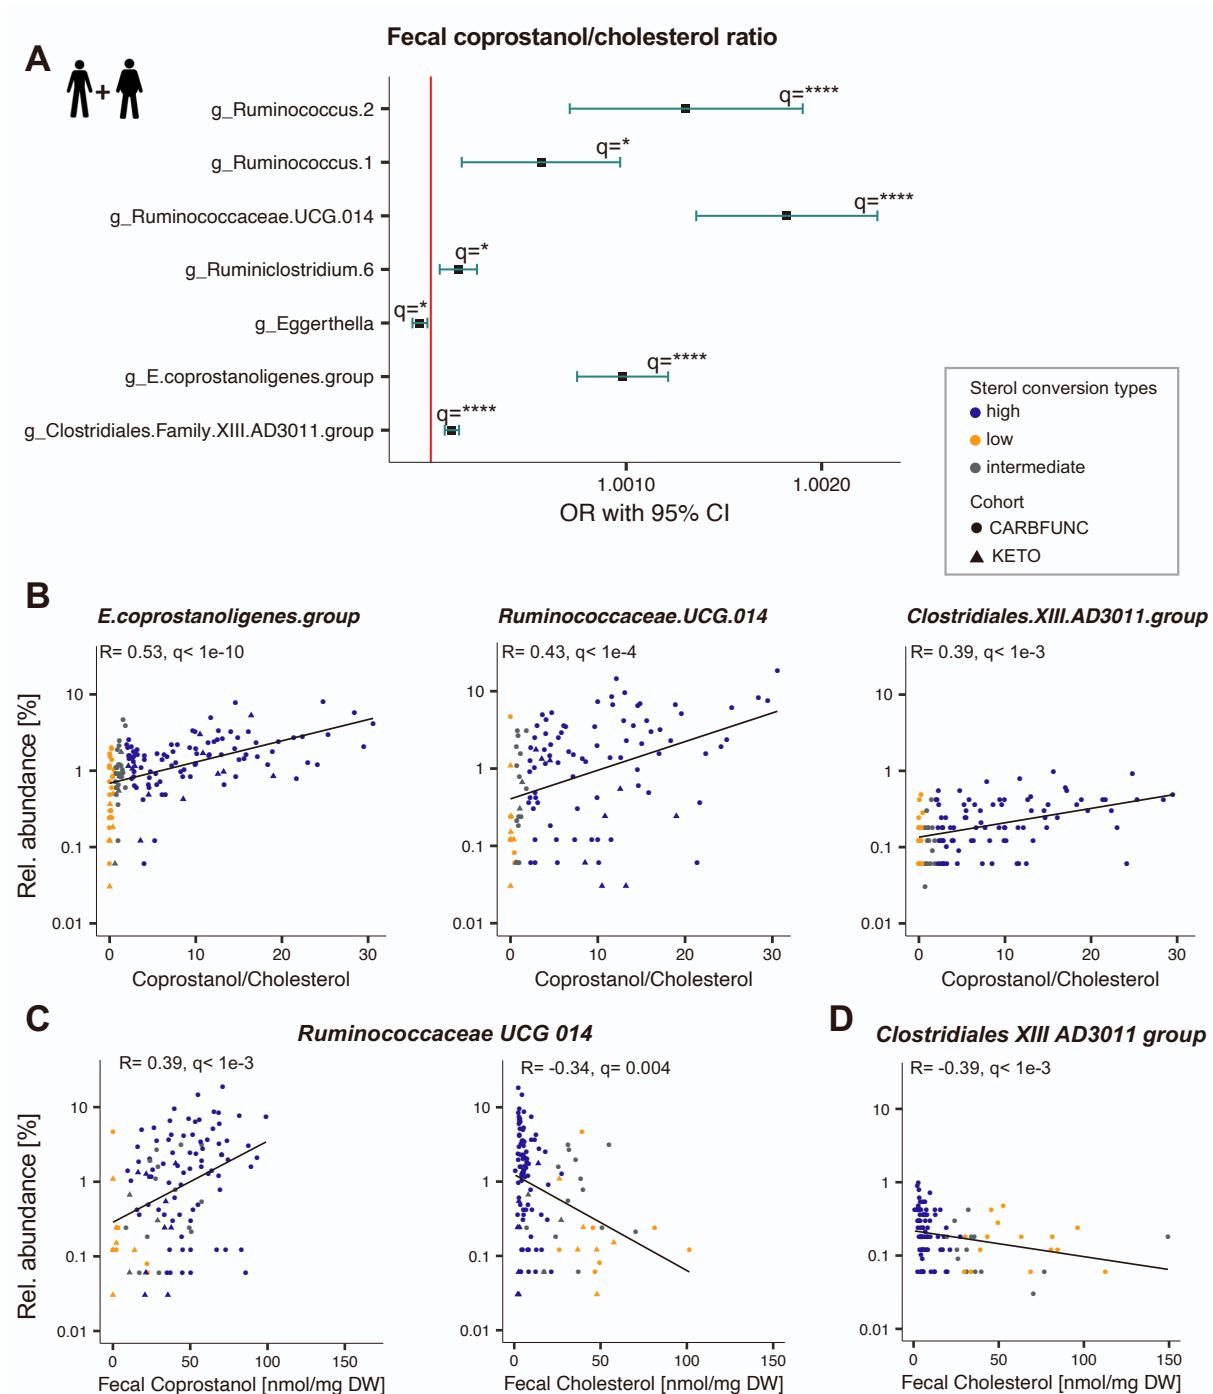

**Figure S1. Associations of fecal taxonomic microbiota composition with the fecal coprostanol/cholesterol ratio, Related to Figure 2.**

(A) Positive and negative associations of bacterial taxa with the fecal coprostanol/cholesterol ratio, as identified by the generalized linear mixed model (GLMM) for the combined dataset of KETO ( $n = 23$ ) and CARBFUNC ( $n = 145$ ) study participants. For the GLMM input, zero values were replaced with a pseudocount and cohort and gender added as random and fixed effects (see Methods for details).

(B) Significant associations with the fecal coprostanol/cholesterol ratio, as supported by Spearman's rank correlation analysis, of *Eubacterium coprostanoligenes.group* ( $n = 158$ ), *Ruminococcaceae.UGC.014* ( $n = 95$ ) and *Clostridiales.XIII.AD3011* ( $n = 111$ , only detected in CARBFUNC samples).

(C) Across both cohorts combined, *Ruminococcaceae.UGC.014* ( $n = 95$ ) was positively correlated with fecal coprostanol and negatively correlated with fecal cholesterol concentrations.

(D) *Clostridiales.XIII.AD3011* ( $n = 111$ ) was only detected in CARBFUNC samples and negatively correlated with fecal cholesterol concentrations.

For all analyses, p-values were Benjamini-Hochberg (BH) corrected:  $q > 0.1$  ns,  $q < 0.1$  \*,  $q < 0.05$  \*\*,  $q < 0.01$  \*\*\*,  $q < 0.001$  \*\*\*\*

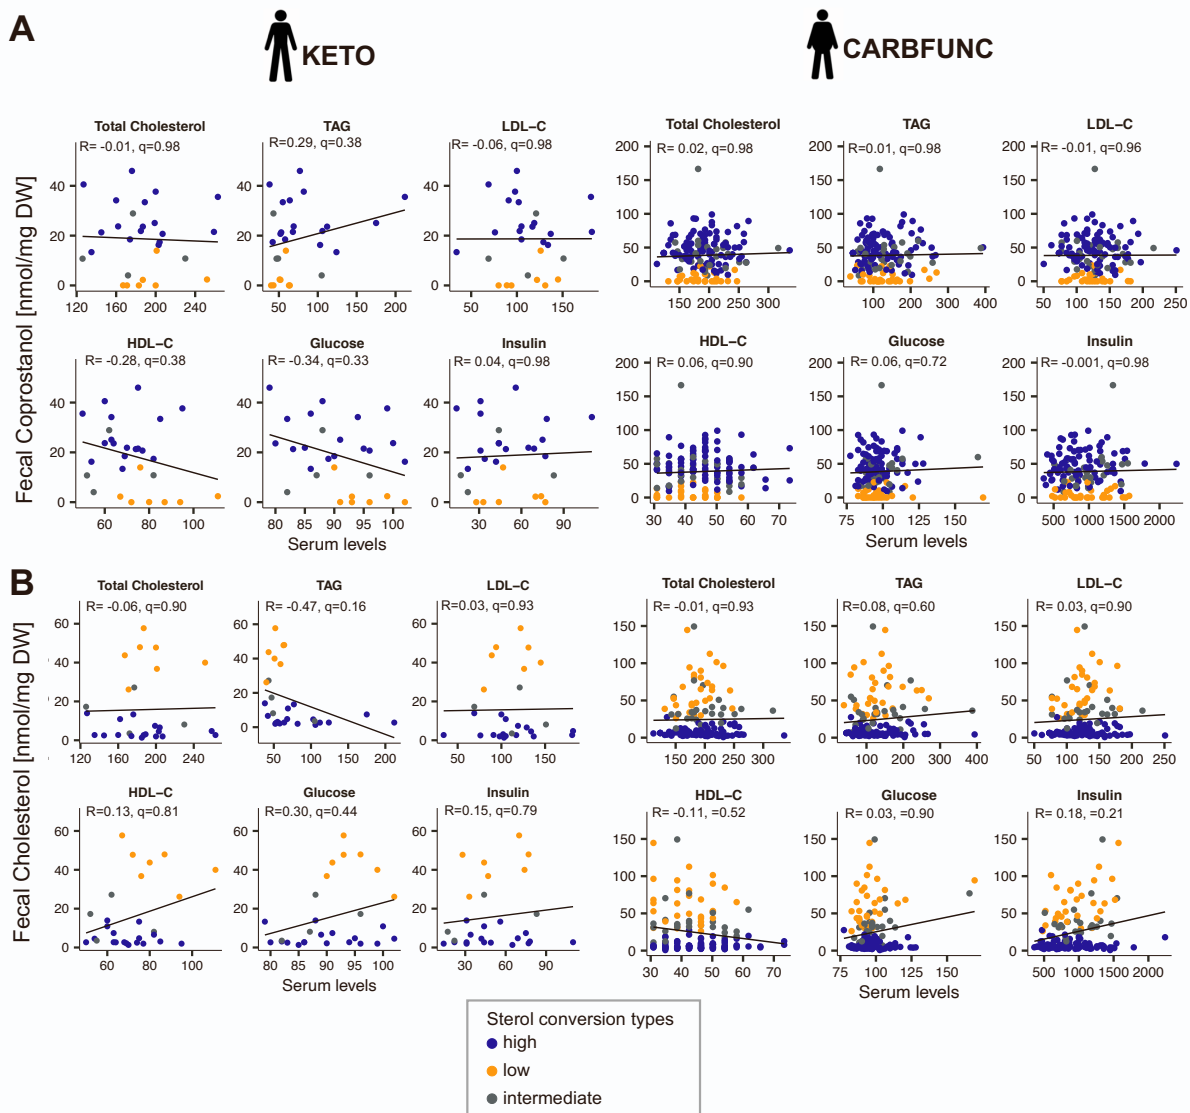

**Figure S2. No associations between fecal cholesterol and coprostanol concentrations and serum lipid levels in both cohorts, Related to Figure 4.** Neither fecal cholesterol nor coprostanol levels were significantly correlated with serum lipids in the KETO or CARBFUNC cohorts. All serum lipids and blood glucose were measured as mg/dL and insulin levels as pmol/L. Spearman's rank correlation with Benjamini-Hochberg (BH) correction.  $n_{\text{KETO}} = 28$ ,  $n_{\text{CARBFUNC}} = 145$ ; Abbreviations: TAG, triacylglycerides; LDL-C, low-density lipoprotein cholesterol; HDL-C, high-density lipoprotein cholesterol.

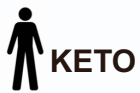

## Fecal Fatty Acids

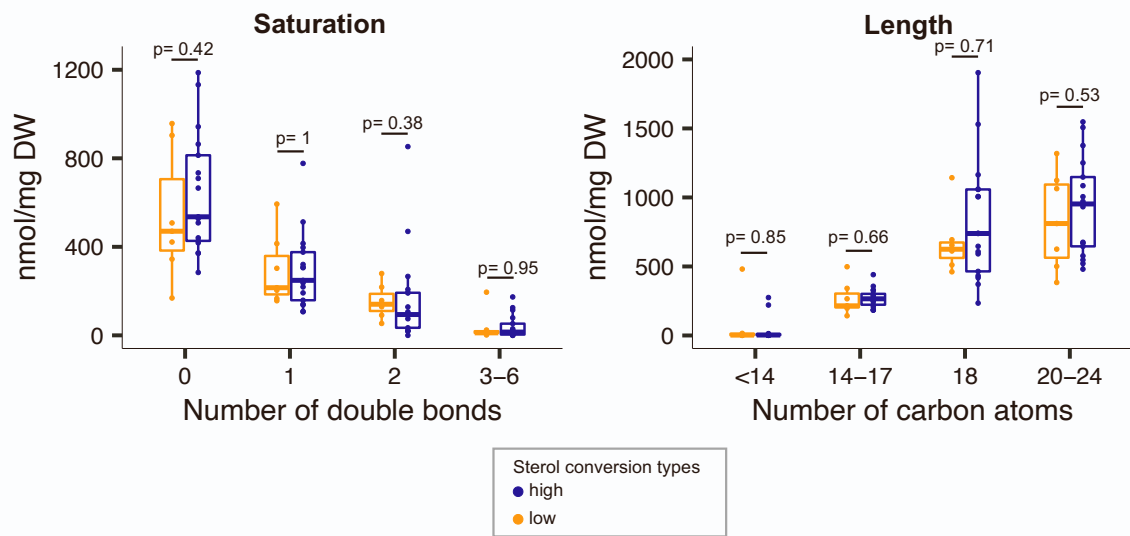

**Figure S3. Similar fecal fatty acid profiles in cholesterol high and low-converters from the KETO cohort before the LCHF diet intervention, Related to Figure 5.** Wilcoxon rank-sum test,  $p > 0.05$  ns,  $n(\text{low-converter}) = 7$ ,  $n(\text{high-converter}) = 17$ . Data are represented as mean  $\pm$  SD.

**Table S1. Overview of KETO and CARBFUNC study cohort parameters, Related to Figures 1 and 4.** Table shows mean values +/- standard deviations (sd). Continuous variables were compared with the Wilcoxon rank-sum test, categorical variables with the Chi-Square test.  $p > 0.05$  ns,  $p < 0.05$  \*,  $p < 0.01$  \*\*,  $p < 0.001$  \*\*\*; Abbreviations: TAG, triacylglycerides; LDL-C, low-density lipoprotein cholesterol; HDL-C, high-density lipoprotein cholesterol; DW, dry weight.

|                                       | KETO<br>(n=28)<br>mean $\pm$ sd | CARBFUNC (n=145)<br>mean $\pm$ sd | p       | Significance<br>thresholds |
|---------------------------------------|---------------------------------|-----------------------------------|---------|----------------------------|
| Sex (female vs male)                  | 20 vs 8                         | 72 vs 73                          | 0.041   | *                          |
| Age [years]                           | 37 $\pm$ 11.73                  | 43 $\pm$ 8.32                     | 0.023   | ***                        |
| BMI                                   | 23.89 $\pm$ 3.14                | 36.86 $\pm$ 4.62                  | < 1e-22 | ***                        |
| Weight [kg]                           | 70.23 $\pm$ 11.51               | 112.16 $\pm$ 18.05                | < 1e-20 | ***                        |
| <u>Serum metabolites [mg/dL]</u>      |                                 |                                   |         |                            |
| Total cholesterol                     | 186.48 $\pm$ 34.73              | 193.91 $\pm$ 36.64                | 0.32    | ns                         |
| TAG                                   | 78.57 $\pm$ 39.08               | 130.46 $\pm$ 60.93                | < 1e-7  | ***                        |
| HDL-C                                 | 71.26 $\pm$ 14.29               | 44.80 $\pm$ 9.07                  | < 1e-13 | ***                        |
| LDL-C                                 | 110.86 $\pm$ 31.33              | 126.74 $\pm$ 31.6                 | 0.03    | *                          |
| TAG/HDL-C                             | 1.13 $\pm$ 0.82                 | 3.19 $\pm$ 2.03                   | < 1e-11 | ***                        |
| LDL-C/HDL-C                           | 1.60 $\pm$ 0.60                 | 2.98 $\pm$ 1.07                   | < 1e-10 | ***                        |
| Glucose                               | 90.79 $\pm$ 6.60                | 97.54 $\pm$ 12.67                 | 0.002   | ***                        |
| Insulin [pmol/L]                      | 50.39 $\pm$ 23.91               | 921.51 $\pm$ 332.29               | < 1e-16 | ***                        |
| <u>Fecal metabolites [nmol/mg DW]</u> |                                 |                                   |         |                            |
| Coprostanol                           | 18.71 $\pm$ 13.44               | 38.75 $\pm$ 27.05                 | < 1e-3  | ***                        |
| Cholesterol                           | 15.76 $\pm$ 17.54               | 24.46 $\pm$ 29.13                 | 0.054   | ns                         |
| Coprostanol/Cholesterol               | 5.50 $\pm$ 5.49                 | 6.38 $\pm$ 7.31                   | 0.62    | ns                         |
| Sitosterol                            | 4.62 $\pm$ 3.99                 | 6.21 $\pm$ 6.89                   | 0.64    | ns                         |
| Stigmastanol                          | 10.39 $\pm$ 6.71                | 9.75 $\pm$ 6.44                   | 0.54    | ns                         |
| Campesterol                           | 1.43 $\pm$ 1.51                 | 2.49 $\pm$ 3.33                   | 0.07    | ns                         |
| Acetate                               | 223.09 $\pm$ 183.82             | 158.35 $\pm$ 110.33               | 0.086   | ns                         |
| Propionate                            | 82.47 $\pm$ 67.7                | 62.64 $\pm$ 47.37                 | 0.19    | ns                         |
| Butyrate                              | 62.85 $\pm$ 49.25               | 58.2 $\pm$ 51.68                  | 0.57    | ns                         |
| Iso-Butyrate                          | 10.3 $\pm$ 6.65                 | 8.19 $\pm$ 6.59                   | 0.015   | *                          |
